# Supplementary material for: Astatine-211-Labeled Gold Nanoparticles for Targeted Alpha-Particle Therapy via Intravenous Injection
Source: MDPI journal article supplement (doi:10.3390/pharmaceutics14122705), 2022-12-02
Supplement: s1 [file s1]

## **Supplementary Information**

### **Astatine-211-Labeled Gold Nanoparticles for Targeted Alpha-particle Therapy via Intravenous Injection**

**Xuhao Huang <sup>1</sup>, Kazuko Kaneda-Nakashima <sup>2,3</sup>, Yuichiro Kadonaga <sup>4</sup>,  
Kazuya Kabayama <sup>1,2,3</sup>, Atsushi Shimoyama <sup>1,2,3</sup>, Kazuhiro Ooe <sup>2,3</sup>, Hiroki Kato <sup>4</sup>,  
Atsushi Toyoshima <sup>2,3</sup>, Atsushi Shinohara <sup>2,5</sup>, Hiromitsu Haba <sup>6</sup>, Yang Wang <sup>6</sup> and  
Koichi Fukase<sup>1,2,3,\*</sup>**

1. Department of Chemistry, Graduate School of Science, Osaka University, 1-1 Machikaneyama, Toyonaka 560-0043, Osaka, Japan
2. Division of Science, Institute for Radiation Sciences, Osaka University, 1-1 Machikaneyama, Toyonaka 560-0043, Osaka, Japan
3. Core for Medicine and Science Collaborative Research and Education, Forefront Research Center, Graduate School of Science, Osaka University, 1-1 Machikaneyama, Toyonaka 560-0043, Osaka, Japan

4. Department of Nuclear Medicine and Tracer Kinetics, Osaka University Graduate School  
of Medicine, 2-2 Yamadaoka, Suita 565-0871, Osaka, Japan
5. Faculty of Health Science, Osaka Aoyama University, 2-11-1 Niina,  
Minoh 562-8580, Osaka, Japan
6. Nishina Center for Accelerator-Based Science, RIKEN, 2-1 Hirosawa,  
Wako 351-0198, Saitama, Japan

**5nm AuNPs@H16**

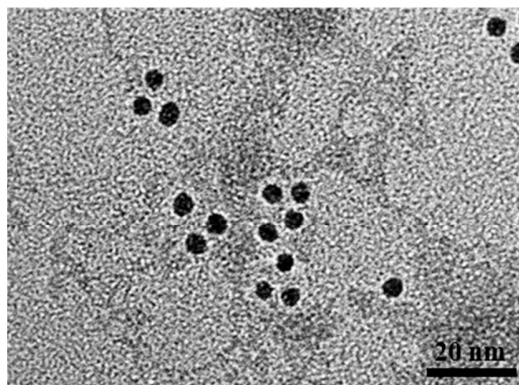

**5nm AuNPs@H16/RGD**

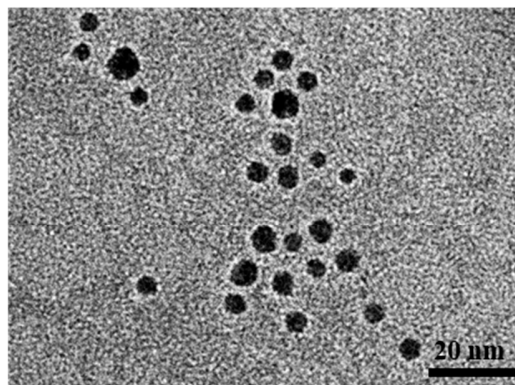

**5nm AuNPs@mPEG**

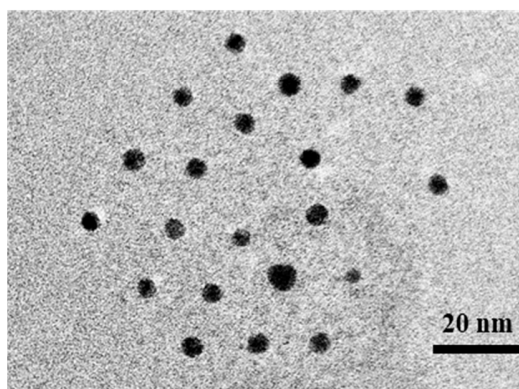

**30nm AuNPs@mPEG**

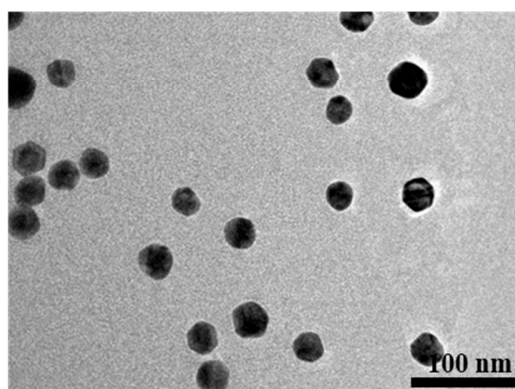

**Figure S1.** Transmission electron microscopy (TEM) images of four AuNPs.

**Table S1.** Hydrodynamic diameter, polydispersity index and zeta-potential of AuNPs.

|                                  | Hydrodynamic diameter<br>(Average) | Polydispersity<br>Index | Zeta-<br>potential |
|----------------------------------|------------------------------------|-------------------------|--------------------|
| 5 nm AuNPs<br>(Citrate buffer)   | 18.58 nm                           | 0.2362                  | -25.8 mV           |
| 30 nm AuNPs<br>(Citrate buffer)  | 33.59 nm                           | 0.2356                  | -41.0 mV           |
| 5 nm AuNPs@mPEG<br>(Water)       | 39.41 nm                           | 0.1245                  | -14.9 mV           |
| 30 nm AuNPs@mPEG<br>(Water)      | 57.58 nm                           | 0.2998                  | -20.8 mV           |
| 5 nm AuNPs@H16<br>(PB pH6.0)     | 28.96 nm                           | 0.3353                  | -0.5 mV            |
| 5 nm AuNPs@H16/RGD<br>(PB pH6.0) | 42.64 nm                           | 0.4037                  | -1.2 mV            |

**Table S2.** Stability evaluation of two kinds of peptides modified AuNPs in PB.

|                                             | Hydrodynamic diameter | Polydispersity Index |
|---------------------------------------------|-----------------------|----------------------|
| 5 nm AuNPs@H16<br>(Diluted to PB pH7.4)     | 32.45 nm              | 0.3962               |
| 5 nm AuNPs@H16<br>(Diluted to PB pH8.0)     | 43.69 nm              | 0.3606               |
| 5 nm AuNPs@H16/RGD<br>(Diluted to PB pH7.4) | 43.17 nm              | 0.3938               |
| 5 nm AuNPs@H16/RGD<br>(Diluted to PB pH8.0) | 42.15 nm              | 0.5424               |

**Table S3.** Evaluation condition of  $^{211}\text{At}$  labeling.

| Samples               | OD | Concentration<br>particles/mL | AuNPs<br>solution<br>volume | $^{211}\text{At}$ solution<br>(MBq/30 $\mu\text{L}$ ) | Radio-<br>chemical<br>yield |
|-----------------------|----|-------------------------------|-----------------------------|-------------------------------------------------------|-----------------------------|
| 5 nm<br>AuNPs@mPEG    | 1  | $5.5 \times 10^{13}$          | 70 $\mu\text{L}$            | 4.7 ~ 5.6                                             | 99.5 %                      |
| 30 nm<br>AuNPs@mPEG   | 1  | $1.8 \times 10^{11}$          | 70 $\mu\text{L}$            | 4.7 ~ 5.6                                             | 97.5 %                      |
| 5 nm<br>AuNPs@H16     | 1  | $5.5 \times 10^{13}$          | 70 $\mu\text{L}$            | 4.7 ~ 5.6                                             | 91.9 %                      |
| 5 nm<br>AuNPs@H16/RGD | 1  | $5.5 \times 10^{13}$          | 70 $\mu\text{L}$            | 4.7 ~ 5.6                                             | 93.4 %                      |

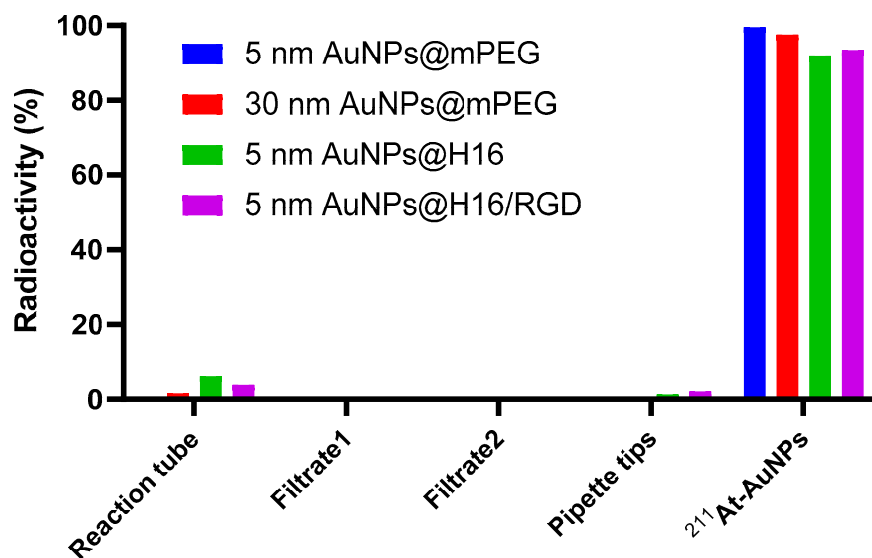

**Figure S2.** Evaluation of  $^{211}\text{At}$  labelling reaction.

$^{211}\text{At}$  solution was mixed with AuNPs solution for five minutes, then the mixture was centrifuged for twice. The radioactivity of reaction tube, filtrate 1, filtrate 2, pipette tips and  $^{211}\text{At}$ -AuNPs was measured in order to calculate the radiochemistry yield.

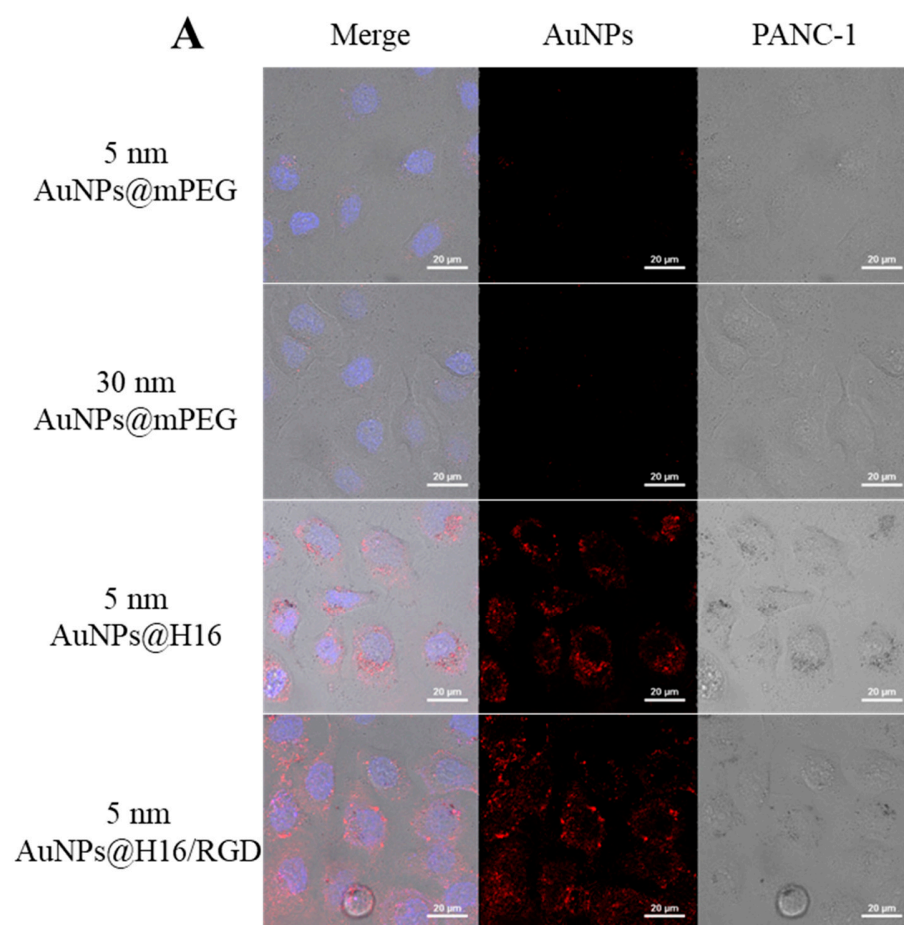



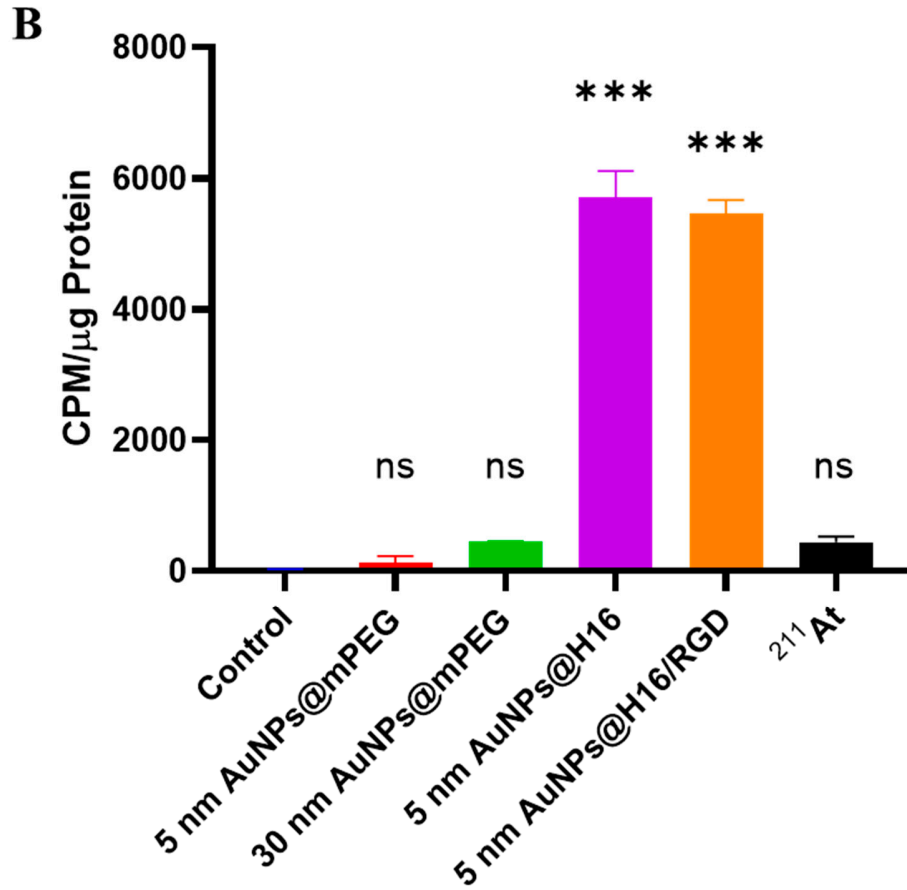

**Figure S3.** Evaluation of AuNPs internalization. (A) Imaging of AuNPs' internalization in PANC-1 cell line. AuNPs were add to the PANC-1 cells and incubated for 24 hours, then reflectance imaging was performed. Red is AuNPs, blue is cell nucleus. Bar = 20μm. (B) Internalization quantification of <sup>211</sup>At-AuNPs in PANC-1 cell line. <sup>211</sup>At-AuNPs were add to the PANC1 cells and incubated for 5 hours, then the radioactivity/μg protein was measured. (\*\*\*)p < 0.001).

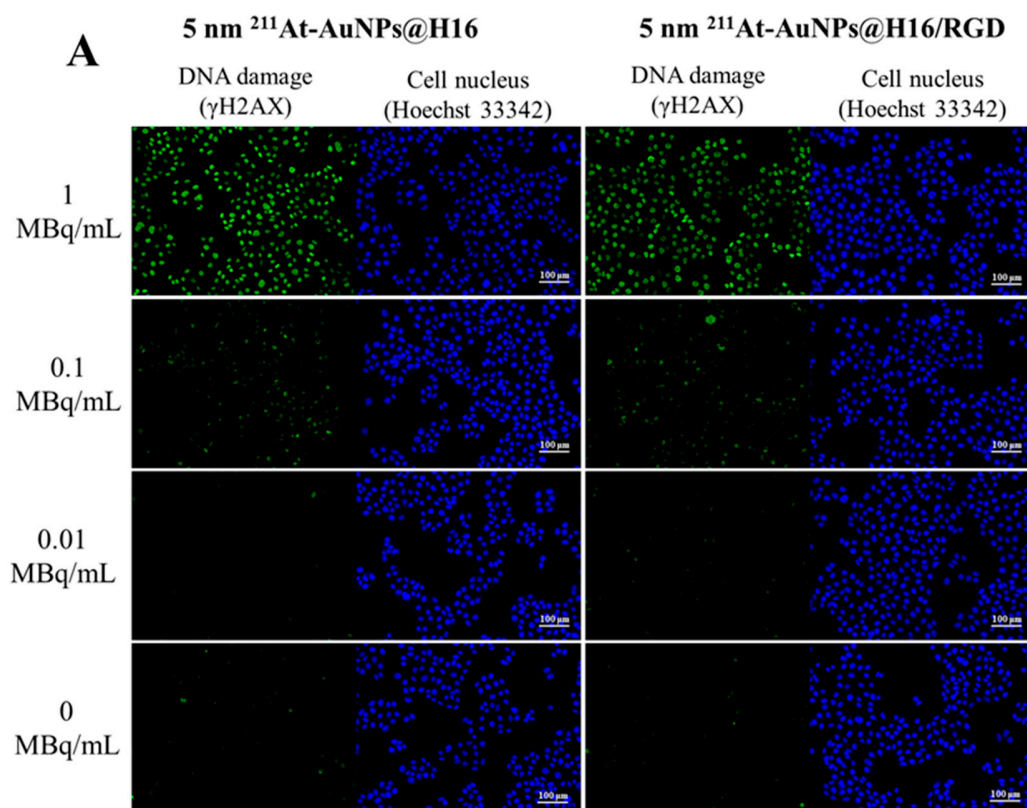

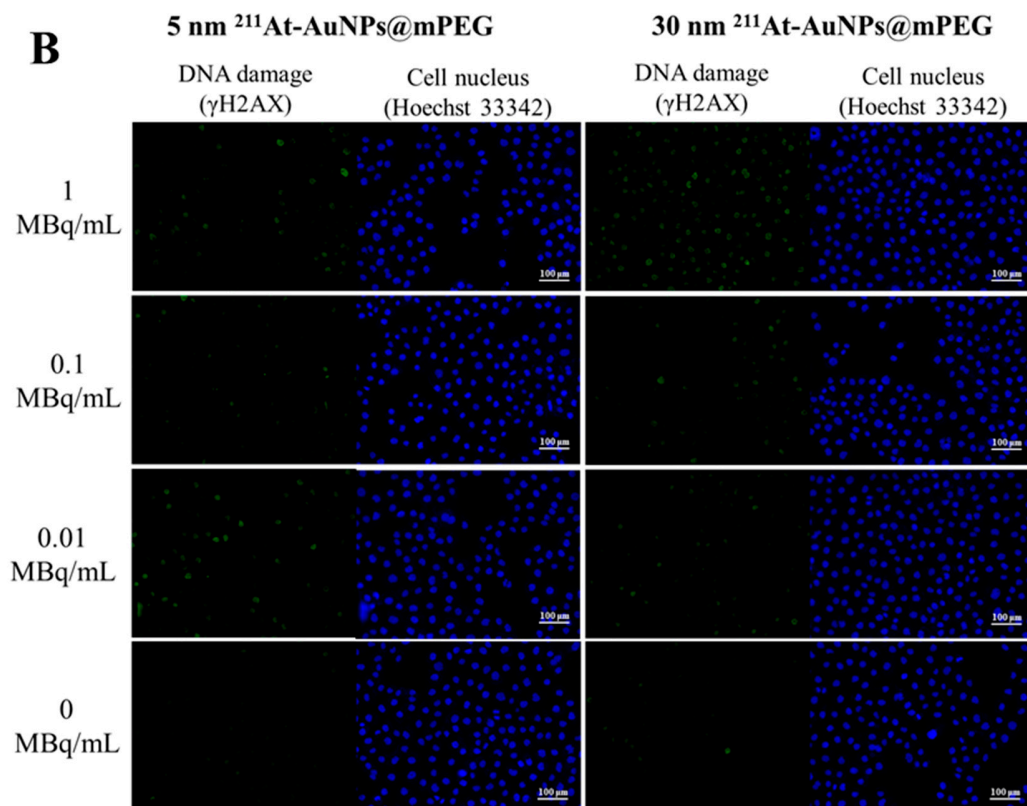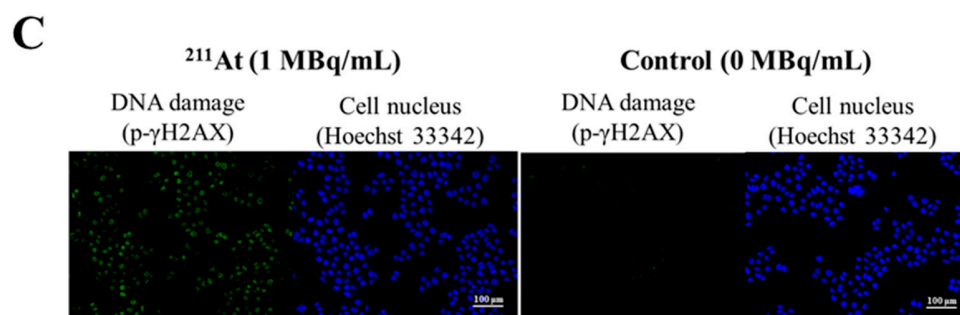

**D**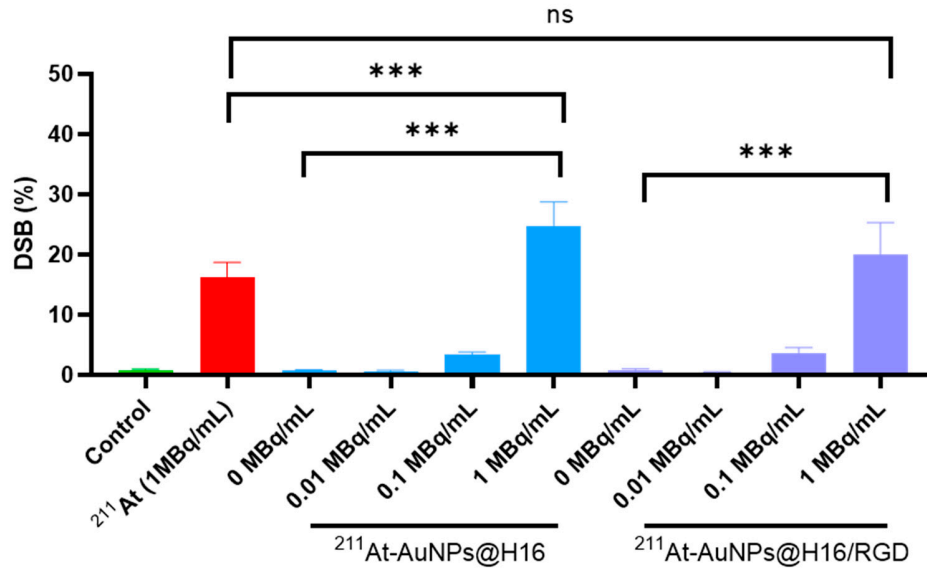**E**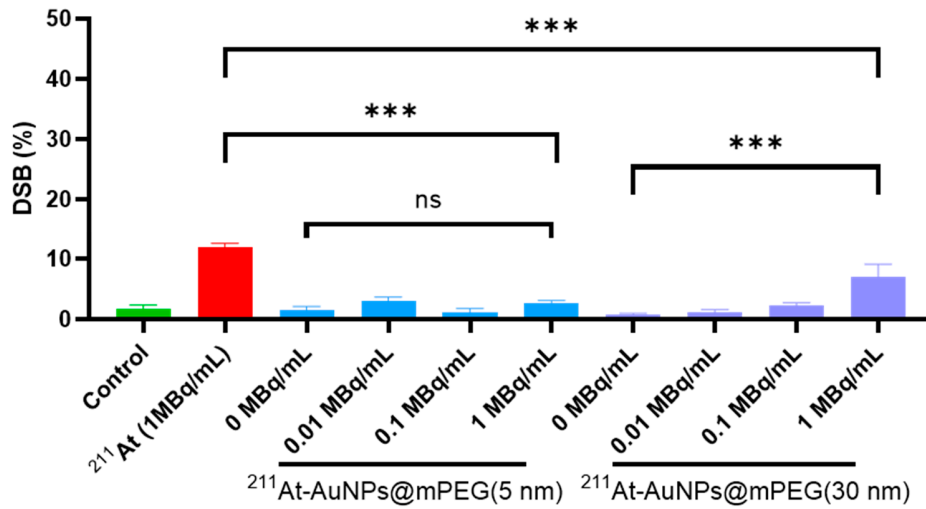

**Figure S4.** DNA double-strand break induced by <sup>211</sup>At-AuNPs. (A–C) Representative images of immunofluorescence staining; green (γH2AX), blue (cell nuclei). (A) DSB induced by 5 nm <sup>211</sup>At-AuNPs@H16 and <sup>211</sup>At-AuNPs@H16/RGD; (B) DSB induced by 5 nm and 30 nm <sup>211</sup>At-AuNPs@mPEG; (C) DSB induced by free <sup>211</sup>At and PBS (Control), (D,E) Quantitative analysis of the DSB induction. DSB% = Average fluorescence intensity of γH2AX / Average fluorescence intensity cell nuclei × %. (ns: no significance, \*\*\*p < 0.001).

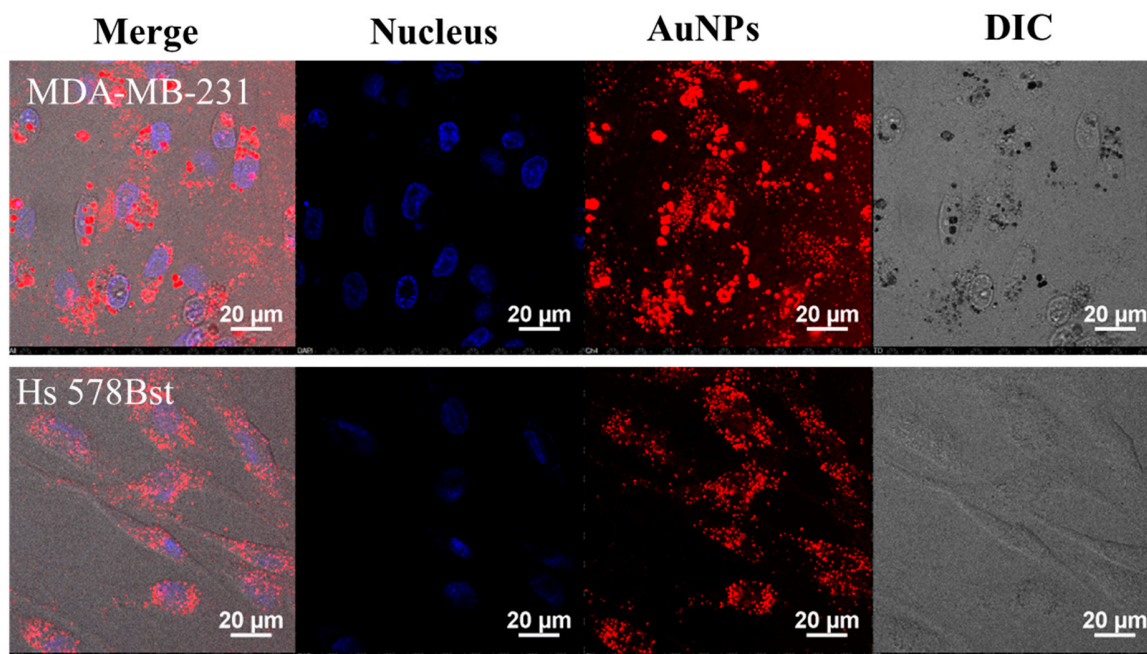

**Figure S5.** Comparison of AuNPs internalization in cancer cells and normal cells.

Imaging of 120 nm AuNPs@mPEG internalization in MDA-MB-231 and Hs 578Bst cell lines. AuNPs were add to the PANC-1 cells and incubated for 24 hours, then reflectance imaging was performed. Red is AuNPs, blue is cell nucleus, DIC is differential interference contrast. Bar = 20 $\mu$ m.
